# Supplementary material
Source: PubMed Central journal article supplement (PMC2838098)
Supplement: supp_84_7_3339__1.pdf [file supp_84_7_3339__1.pdf]

Figure S1

# Genogroup B

- Malaysia
- Japan
- Singapore
- Taiwan
- Australia
- United States
- Hungary
- Bulgaria

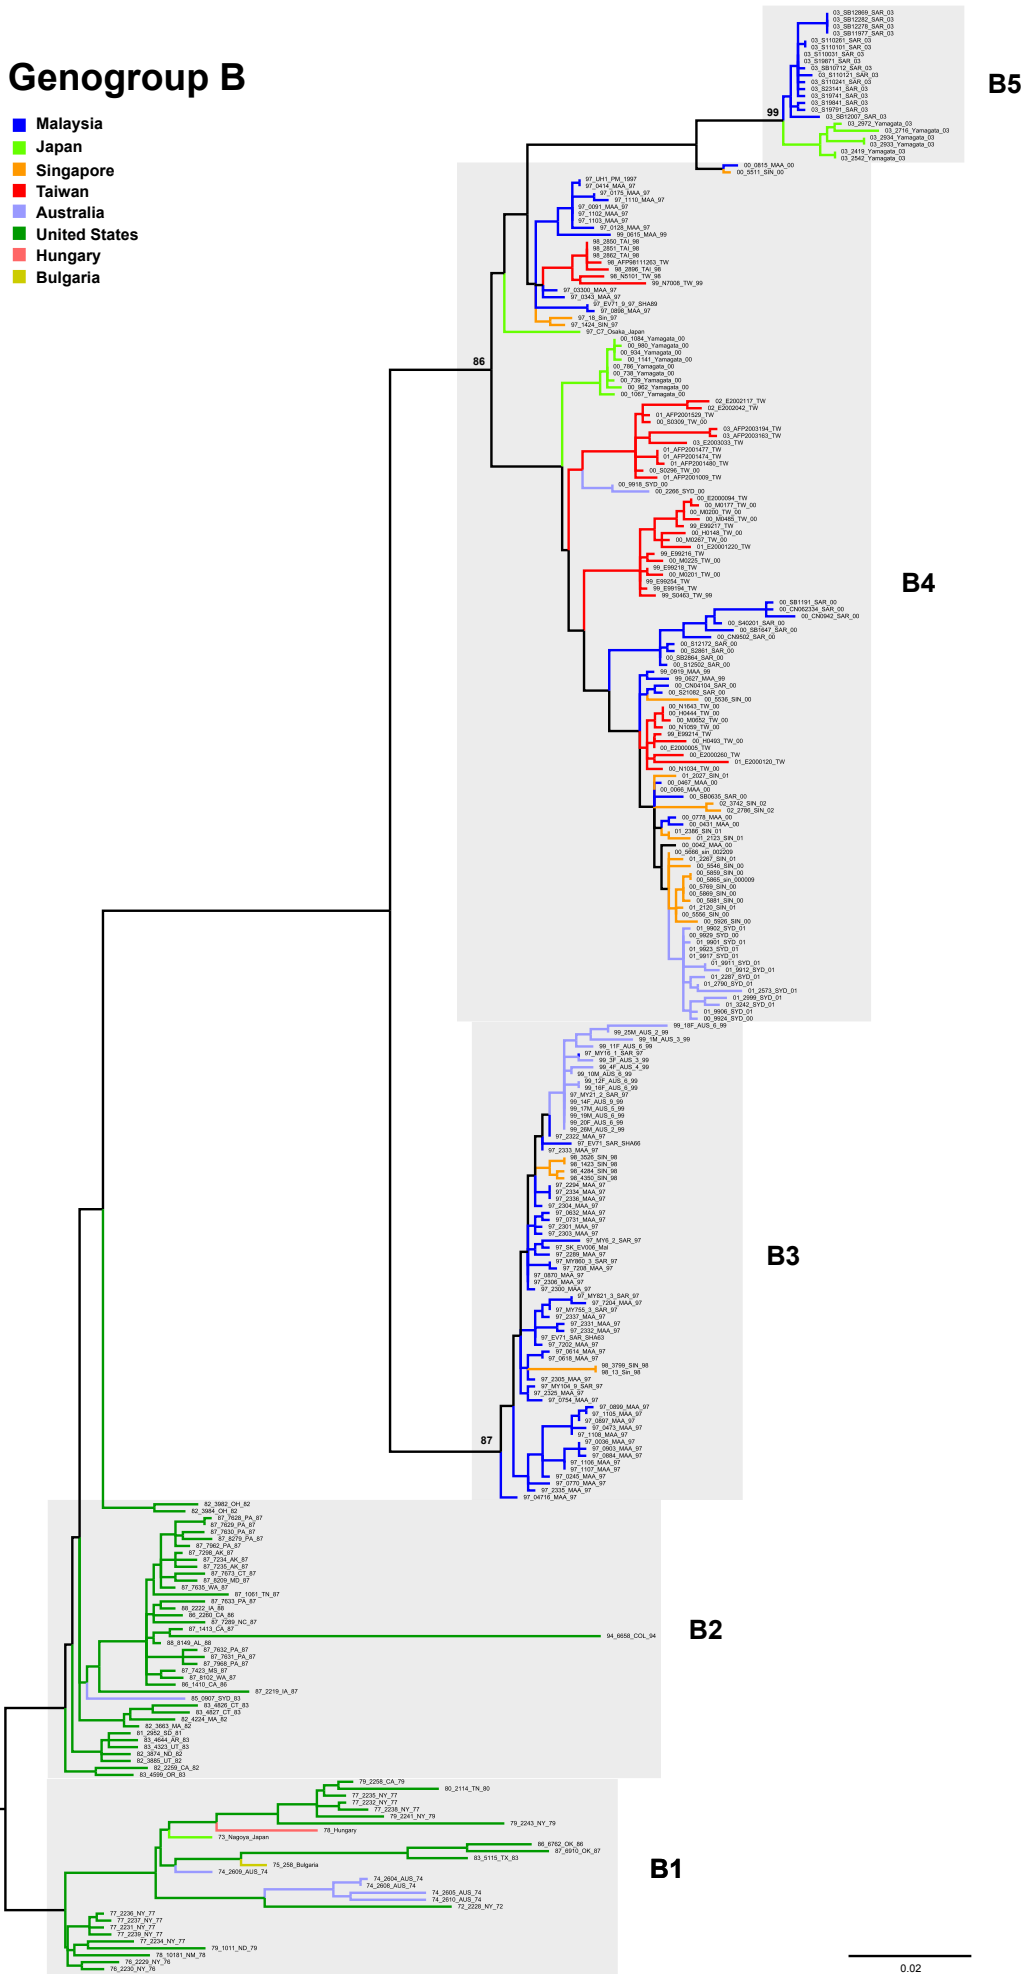

B5

B4

B3

B2

B1

0.02
