# Supplementary material
Source: PubMed Central journal article supplement (PMC2838098)

Figure S2

# Genogroup C

- Taiwan
- United Kingdom
- Australia
- United States
- Japan
- Malaysia
- Korea
- China
- Vietnam
- Singapore
- Thailand
- Canada

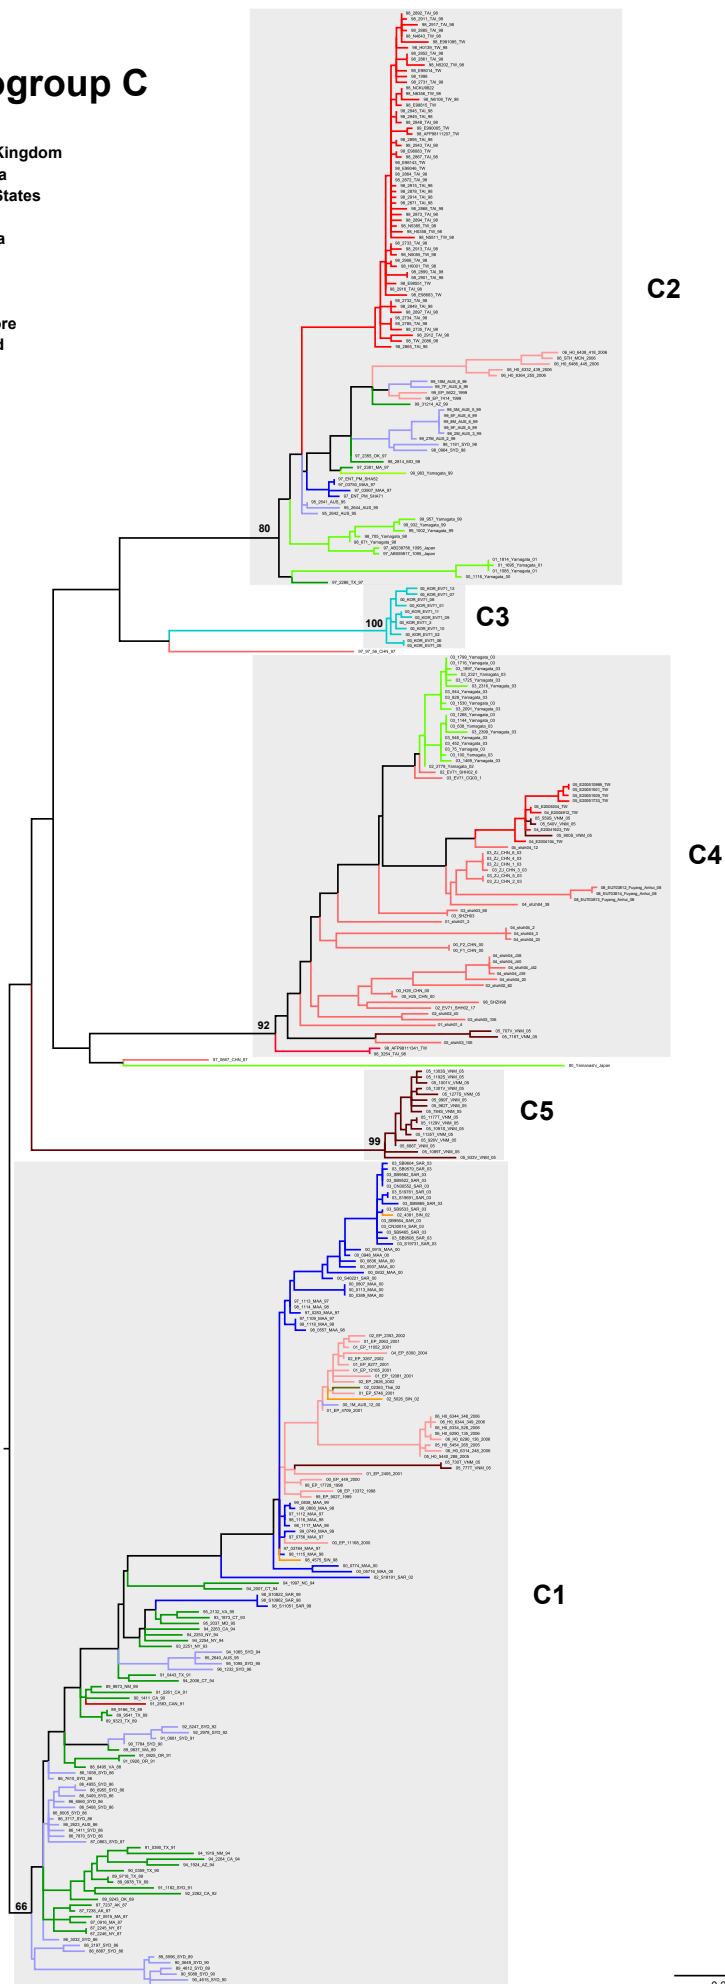

Supplement: supp_84_7_3339__2.pdf [file supp_84_7_3339__2.pdf]
