# Supplementary material
Source: PubMed Central journal article supplement (PMC2838098)
Supplement: supp_84_7_3339__3.pdf [file supp_84_7_3339__3.pdf]

**TABLE S1****Enterovirus 71 VP1 gene**

Note: Sequences are labeled as Year-Accession-Patient code, and sorted by the year of collection.

**Genogroup A (n=1)**

> 70-U22521-BrCr-CA-70

**Genogroup B (n=283)**

> 72-AF135867-2228-NY-72  
 > 73-AB059813-Nagoya/Japan  
 > 74-AF135883-2604-AUS-74  
 > 74-AF135884-2605-AUS-74  
 > 74-AF135885-2608-AUS-74  
 > 74-AF135886-2609-AUS-74  
 > 74-AF135887-2610-AUS-74  
 > 75-AB059814-258/Bulgaria  
 > 76-AF135868-2229-NY-76  
 > 76-AF135869-2230-NY-76  
 > 77-AF135870-2231-NY-77  
 > 77-AF135871-2232-NY-77  
 > 77-AF135872-2234-NY-77  
 > 77-AF135873-2235-NY-77  
 > 77-AF135874-2236-NY-77  
 > 77-AF135875-2237-NY-77  
 > 77-AF135876-2238-NY-77  
 > 77-AF135877-2239-NY-77  
 > 78-AB059815-Hungary  
 > 78-AF135865-10181-NM-78  
 > 79-AF135864-1011-ND-79  
 > 79-AF135878-2241-NY-79  
 > 79-AF135879-2243-NY-79  
 > 79-AF135880-2258-CA-79  
 > 80-AF135866-2114-TN-80  
 > 81-AF135888-2952-SD-81  
 > 82-AF009538-3984-OH-82  
 > 82-AF135881-2259-CA-82  
 > 82-AF135889-3663-MA-82  
 > 82-AF135890-3874-ND-82  
 > 82-AF135891-3885-UT-82  
 > 82-AF135892-3982-OH-82  
 > 82-AF135893-4224-MA-82  
 > 83-AF009529-4827-CT-83  
 > 83-AF135894-4323-UT-83  
 > 83-AF135895-4599-OR-83  
 > 83-AF135896-4644-AR-83  
 > 83-AF135897-4826-CT-83  
 > 83-AF135898-5115-TX-83  
 > 85-AY722882-0907-SYD-83  
 > 86-AF009525-1410-CA-86  
 > 86-AF135882-2260-CA-86  
 > 86-AF135900-6762-OK-86  
 > 87-AF009522-7234-AK-87  
 > 87-AF009523-7962-PA-87  
 > 87-AF009524-7968-PA-87  
 > 87-AF009526-8102-WA-87  
 > 87-AF009527-1413-CA-87  
 > 87-AF009528-1061-TN-87  
 > 87-AF009530-7628-PA-87  
 > 87-AF009531-7629-PA-87  
 > 87-AF009532-7630-PA-87  
 > 87-AF009533-7631-PA-87  
 > 87-AF009534-7633-PA-87  
 > 87-AF009535-7673-CT-87  
 > 87-AF009536-8209-MD-87

> 87-AF009537-8279-PA-87  
 > 87-AF009539-2219-IA-87  
 > 87-AF135901-6910-OK-87  
 > 87-AF135902-7235-AK-87  
 > 87-AF135903-7289-NC-87  
 > 87-AF135904-7298-AK-87  
 > 87-AF135905-7632-PA-87  
 > 87-AF135906-7635-WA-87  
 > 87-U22522-7423-MS-87  
 > 88-AF009540-2222-IA-88  
 > 88-AF135907-8149-AL-88  
 > 94-AF135899-6658-COL-94  
 > 97-AB059818-C7/Osaka/Japan  
 > 97-AB059819-SK-EV006/Malaysia  
 > 97-AF135908-0614-MAA-97  
 > 97-AF135909-0618-MAA-97  
 > 97-AF135910-0632-MAA-97  
 > 97-AF135911-0731-MAA-97  
 > 97-AF135912-0754-MAA-97  
 > 97-AF135913-0770-MAA-97  
 > 97-AF135914-2289-MAA-97  
 > 97-AF135915-2300-MAA-97  
 > 97-AF135916-2301-MAA-97  
 > 97-AF135917-2303-MAA-97  
 > 97-AF135918-2304-MAA-97  
 > 97-AF135919-2305-MAA-97  
 > 97-AF135920-2306-MAA-97  
 > 97-AF135921-2322-MAA-97  
 > 97-AF135922-2325-MAA-97  
 > 97-AF135923-2331-MAA-97  
 > 97-AF135924-2332-MAA-97  
 > 97-AF135925-2333-MAA-97  
 > 97-AF135926-2335-MAA-97  
 > 97-AF135927-2336-MAA-97  
 > 97-AF135928-2337-MAA-97  
 > 97-AF135929-7204-MAA-97  
 > 97-AF135930-7208-MAA-97  
 > 97-AF190559-1102-MAA-97  
 > 97-AF190560-1103-MAA-97  
 > 97-AF190561-1105-MAA-97  
 > 97-AF190562-1106-MAA-97  
 > 97-AF190563-1107-MAA-97  
 > 97-AF190564-1108-MAA-97  
 > 97-AF190566-1110-MAA-97  
 > 97-AF190569-2294-MAA-97  
 > 97-AF190570-2334-MAA-97  
 > 97-AF190571-7202-MAA-97  
 > 97-AF251359-18/Sin/97  
 > 97-AF286490-1424-SIN-97  
 > 97-AF376072-MY104/9/SAR/97  
 > 97-AF376073-MY16/1/SAR/97  
 > 97-AF376074-MY21/2/SAR/97  
 > 97-AF376075-MY6/2/SAR/97  
 > 97-AF376076-MY755/3/SAR/97  
 > 97-AF376077-MY821/3/SAR/97  
 > 97-AF376078-MY860/3/SAR/97  
 > 97-AJ586873-EV71/9/97/SHA89  
 > 97-AM396586-EV71/SAR/SHA66  
 > 97-AM396587-UH1/PM/1997  
 > 97-AM396588-EV71/SAR/SHA63  
 > 97-AY207613-03300-MAA-97  
 > 97-AY207614-0870-MAA-97  
 > 97-AY207616-0473-MAA-97  
 > 97-AY207636-04716-MAA-97  
 > 97-AY207637-0343-MAA-97  
 > 97-AY207639-0245-MAA-97  
 > 97-AY207640-0175-MAA-97  
 > 97-AY207641-0036-MAA-97  
 > 97-AY207642-0899-MAA-97  
 > 97-AY207643-0898-MAA-97  
 > 97-AY207644-0897-MAA-97  
 > 97-AY207645-0884-MAA-97  
 > 97-AY207646-0414-MAA-97  
 > 97-AY207647-0128-MAA-97  
 > 97-AY207648-0903-MAA-97  
 > 97-AY207649-0091-MAA-97  
 > 98-AF251358-13/Sin/98  
 > 98-AF286489-1423-SIN-98  
 > 98-AF286499-2850-TAI-98  
 > 98-AF286500-2851-TAI-98  
 > 98-AF286503-2862-TAI-98  
 > 98-AF286516-2896-TAI-98  
 > 98-AF376116-3526/SIN/98  
 > 98-AF376117-3799/SIN/98  
 > 98-AF376118-4284/SIN/98  
 > 98-AF376119-4350/SIN/98  
 > 98-AY055174-N5101-TW-98  
 > 98-DQ841972-AFP98111263-TW  
 > 99-AF376088-10M/AUS/6/99  
 > 99-AF376089-11F/AUS/6/99  
 > 99-AF376090-12F/AUS/6/99  
 > 99-AF376091-14F/AUS/9/99  
 > 99-AF376093-16F/AUS/6/99  
 > 99-AF376094-17M/AUS/5/99  
 > 99-AF376095-18F/AUS/6/99  
 > 99-AF376096-19M/AUS/6/99  
 > 99-AF376097-1M/AUS/3/99  
 > 99-AF376099-20F/AUS/6/99  
 > 99-AF376100-25M/AUS/2/99  
 > 99-AF376101-26M/AUS/2/99  
 > 99-AF376104-3F/AUS/3/99  
 > 99-AF376105-4F/AUS/4/99  
 > 99-AY055189-S0463-TW-99  
 > 99-AY055201-N7008-TW-99  
 > 99-AY207650-0919-MAA-99  
 > 99-AY207651-0627-MAA-99  
 > 99-AY207652-0615-MAA-99  
 > 99-DQ841973-E99194-TW  
 > 99-DQ841974-E99214-TW  
 > 99-DQ841975-E99216-TW  
 > 99-DQ841976-E99217-TW  
 > 99-DQ841977-E99218-TW  
 > 99-DQ841978-E99254-TW  
 > 00-AB177809-934-Yamagata-00  
 > 00-AB177811-1141-Yamagata-00  
 > 00-AB213620-738-Yamagata-00  
 > 00-AB213621-739-Yamagata-00  
 > 00-AB213622-786-Yamagata-00  
 > 00-AB213623-962-Yamagata-00  
 > 00-AB213624-980-Yamagata-00  
 > 00-AB213625-1067-Yamagata-00  
 > 00-AB213626-1084-Yamagata-00  
 > 00-AF316321-5865/sin/000009  
 > 00-AF352027-5666/sin/002209  
 > 00-AF376064-SB1191/SAR/00  
 > 00-AF376065-SB1647/SAR/00  
 > 00-AF376066-SB2864/SAR/00  
 > 00-AF376067-CN04104/SAR/00  
 > 00-AF376068-CN062334/SAR/00  
 > 00-AF376069-SB0635/SAR/00  
 > 00-AF376070-CN0942/SAR/00  
 > 00-AF376071-CN9502/SAR/00  
 > 00-AF376082-S12172/SAR/00  
 > 00-AF376083-S12502/SAR/00  
 > 00-AF376084-S21082/SAR/00  
 > 00-AF376085-S2861/SAR/00  
 > 00-AF376086-S40201/SAR/00  
 > 00-AF376121-5511/SIN/00  
 > 00-AF376122-5536/SIN/00  
 > 00-AF376123-5546/SIN/00  
 > 00-AF376124-5556/SIN/00  
 > 00-AF376125-5769/SIN/00  
 > 00-AF376126-5859/SIN/00  
 > 00-AF376127-5869/SIN/00  
 > 00-AF376128-5881/SIN/00  
 > 00-AF376129-5926/SIN/00

> 00-AY055175-S0296-TW-00  
> 00-AY055176-S0309-TW-00  
> 00-AY055177-N1643-TW-00  
> 00-AY055178-H0444-TW-00  
> 00-AY055179-M0652-TW-00  
> 00-AY055180-N1059-TW-00  
> 00-AY055181-N1034-TW-00  
> 00-AY055182-H0493-TW-00  
> 00-AY055183-H0148-TW-00  
> 00-AY055184-M0267-TW-00  
> 00-AY055185-M0177-TW-00  
> 00-AY055186-M0200-TW-00  
> 00-AY055187-M0485-TW-00  
> 00-AY055188-M0201-TW-00  
> 00-AY055190-M0225-TW-00  
> 00-AY207617-0778-MAA-00  
> 00-AY207623-0042-MAA-00  
> 00-AY207624-0066-MAA-00  
> 00-AY207627-0431-MAA-00  
> 00-AY207628-0467-MAA-00  
> 00-AY207633-0815-MAA-00  
> 00-AY722910-2266-SYD-00  
> 00-AY940106-9918-SYD-00  
> 00-AY940108-9924-SYD-00  
> 00-AY940109-9929-SYD-00  
> 00-DQ841979-E2000094-TW  
> 00-DQ841980-E2000260-TW  
> 00-DQ841981-E2000005-TW  
> 01-AF376111-2027/SIN/01  
> 01-AF376112-2120/SIN/01  
> 01-AF376113-2123/SIN/01  
> 01-AF376114-2267/SIN/01  
> 01-AF376115-2386/SIN/01  
> 01-AY722911-2790-SYD-01  
> 01-AY722912-2573-SYD-01  
> 01-AY722913-2999-SYD-01  
> 01-AY722914-3242-SYD-01  
> 01-AY722915-2287-SYD-01  
> 01-AY940100-9901-SYD-01  
> 01-AY940101-9902-SYD-01  
> 01-AY940102-9906-SYD-01  
> 01-AY940103-9911-SYD-01  
> 01-AY940104-9912-SYD-01  
> 01-AY940105-9917-SYD-01  
> 01-AY940107-9923-SYD-01  
> 01-DQ841982-E2000120-TW  
> 01-DQ841983-E20001220-TW  
> 01-DQ841984-AFP2001480-TW  
> 01-DQ841985-AFP2001474-TW  
> 01-DQ841986-AFP2001477-TW  
> 01-DQ841987-AFP2001009-TW  
> 01-DQ841988-AFP2001529-TW  
> 02-AY258320-3742-SIN-02  
> 02-AY258321-2786-SIN-02  
> 02-DQ841989-E2002042-TW  
> 02-DQ841990-E2002117-TW  
> 03-AB177815-2542-Yamagata-03  
> 03-AB177816-2716-Yamagata-03  
> 03-AB213647-2419-Yamagata-03  
> 03-AB213648-2933-Yamagata-03  
> 03-AB213649-2934-Yamagata-03  
> 03-AB213650-2972-Yamagata-03  
> 03-AY258303-S110261-SAR-03  
> 03-AY258304-S110241-SAR-03  
> 03-AY258305-S110121-SAR-03  
> 03-AY258306-S110101-SAR-03  
> 03-AY258307-S110031-SAR-03  
> 03-AY258308-S23141-SAR-03  
> 03-AY258309-S19871-SAR-03  
> 03-AY258310-S19841-SAR-03  
> 03-AY258311-S19791-SAR-03  
> 03-AY258313-S19741-SAR-03  
> 03-AY905545-SB12869-SAR-03

> 03-AY905546-SB12282-SAR-03  
> 03-AY905547-SB12278-SAR-03  
> 03-AY905548-SB12007-SAR-03  
> 03-AY905549-SB11977-SAR-03  
> 03-AY905550-SB10712-SAR-03  
> 03-DQ841991-E2003033-TW  
> 03-DQ841992-AFP2003163-TW  
> 03-DQ841993-AFP2003194-TW

### Genogroup C (n=344)

> 86-AF135945-2623-AUS-86  
> 86-AY722883-4955-SYD-86  
> 86-AY722884-1058-SYD-86  
> 86-AY722885-8005-SYD-86  
> 86-AY722886-7610-SYD-86  
> 86-AY722887-6887-SYD-86  
> 86-AY722888-6955-SYD-86  
> 86-AY722889-2197-SYD-86  
> 86-AY722890-6560-SYD-86  
> 86-AY722891-5409-SYD-86  
> 86-AY722892-1411-SYD-86  
> 86-AY722893-5408-SYD-86  
> 86-AY722894-7870-SYD-86  
> 86-AY722895-3032-SYD-86  
> 86-AY722896-3717-SYD-86  
> 87-AF009541-2245-NY-87  
> 87-AF009542-2246-NY-87  
> 87-AF009549-0915-MA-87  
> 87-AF009550-0916-MA-87  
> 87-AF135951-7237-AK-87  
> 87-AF135952-7238-AK-87  
> 87-AY722897-0863-SYD-87  
> 88-AF135953-8495-VA-88  
> 89-AF009557-9541-TX-89  
> 89-AF009558-9978-TX-89  
> 89-AF135954-9166-TX-89  
> 89-AF135955-9243-OK-89  
> 89-AF135956-9323-TX-89  
> 89-AF135957-9718-TX-89  
> 89-AF135958-9837-WA-89  
> 89-AF135959-9873-NM-89  
> 89-AY722898-4812-SYD-89  
> 89-AY722899-5596-SYD-89  
> 90-AF009551-1411-CA-90  
> 90-AF135931-0359-TX-90  
> 90-AY722900-5088-SYD-90  
> 90-AY722901-0649-SYD-90  
> 90-AY722902-7784-SYD-90  
> 90-AY722903-4615-SYD-90  
> 91-AF009547-0925-OR-91  
> 91-AF009548-0926-OR-91  
> 91-AF135932-0390-TX-91  
> 91-AF135933-0443-TX-91  
> 91-AF135938-2261-CA-91  
> 91-AF135944-2583-CAN-91  
> 91-AY722904-1182-SYD-91  
> 91-AY722905-0681-SYD-91  
> 91-AY722906-9855-SYD-91  
> 92-AF135939-2262-CA-92  
> 92-AY722907-5247-SYD-92  
> 92-AY722908-2978-SYD-92  
> 93-AF009543-2251-NY-93  
> 93-AF009549-1873-CT-93  
> 94-AF009544-2253-NY-94  
> 94-AF009545-2254-NY-94  
> 94-AF009546-2264-CA-94  
> 94-AF009552-1919-NM-94  
> 94-AF009553-1924-AZ-94  
> 94-AF009554-2006-CT-94  
> 94-AF009555-2007-CT-94  
> 94-AF135936-1997-NC-94

> 94-AF135940-2263-CA-94  
> 94-AY722909-1065-SYD-94  
> 95-AF009556-2037-MD-95  
> 95-AF135937-2132-VA-95  
> 95-AF135946-2640-AUS-95  
> 95-AF135947-2641-AUS-95  
> 95-AF135948-2642-AUS-95  
> 95-AF135949-2644-AUS-95  
> 95-AY940110-1095-SYD-95  
> 96-AY940111-1232-SYD-96  
> 97-AB059817-1095/Japan  
> 97-AB239756-1095/Japan  
> 97-AF135935-0756-MAA-97  
> 97-AF135941-2286-TX-97  
> 97-AF135942-2355-OK-97  
> 97-AF135943-2381-MA-97  
> 97-AF190565-1109-MAA-97  
> 97-AF190567-1112-MAA-97  
> 97-AF190568-1113-MAA-97  
> 97-AM396584-ENT/PM/SHA52  
> 97-AM396585-ENT/PM/SHA71  
> 97-AY207611-03907-MAA-97  
> 97-AY207612-03784-MAA-97  
> 97-AY207615-03750-MAA-97  
> 97-AY207638-0283-MAA-97  
> 98-AB213614-671-Yamagata-98  
> 98-AB213615-705-Yamagata-98  
> 98-AF119796-TW/2086/98  
> 98-AF135950-2814-MO-98  
> 98-AF136379-NCKU9822  
> 98-AF176044-1998  
> 98-AF190572-1114-MAA-98  
> 98-AF190573-1115-MAA-98  
> 98-AF190574-1116-MAA-98  
> 98-AF190575-1117-MAA-98  
> 98-AF190576-1118-MAA-98  
> 98-AF286491-2731-TAI-98  
> 98-AF286492-2732-TAI-98  
> 98-AF286493-2733-TAI-98  
> 98-AF286494-2734-TAI-98  
> 98-AF286495-2735-TAI-98  
> 98-AF286496-2785-TAI-98  
> 98-AF286497-2848-TAI-98  
> 98-AF286498-2849-TAI-98  
> 98-AF286501-2852-TAI-98  
> 98-AF286502-2861-TAI-98  
> 98-AF286504-2864-TAI-98  
> 98-AF286505-2865-TAI-98  
> 98-AF286506-2867-TAI-98  
> 98-AF286507-2868-TAI-98  
> 98-AF286508-2871-TAI-98  
> 98-AF286509-2872-TAI-98  
> 98-AF286510-2873-TAI-98  
> 98-AF286511-2878-TAI-98  
> 98-AF286512-2885-TAI-98  
> 98-AF286513-2892-TAI-98  
> 98-AF286514-2894-TAI-98  
> 98-AF286515-2895-TAI-98  
> 98-AF286517-2897-TAI-98  
> 98-AF286518-2899-TAI-98  
> 98-AF286519-2901-TAI-98  
> 98-AF286520-2906-TAI-98  
> 98-AF286521-2911-TAI-98  
> 98-AF286522-2912-TAI-98  
> 98-AF286523-2913-TAI-98  
> 98-AF286524-2914-TAI-98  
> 98-AF286525-2915-TAI-98  
> 98-AF286526-2916-TAI-98  
> 98-AF286527-2917-TAI-98  
> 98-AF286528-2943-TAI-98  
> 98-AF286529-2945-TAI-98  
> 98-AF286530-2949-TAI-98  
> 98-AF286531-3254-TAI-98

> 98-AF302996-SHZH98  
 > 98-AF376079-S10822/SAR/98  
 > 98-AF376080-S10862/SAR/98  
 > 98-AF376081-S11051/SAR/98  
 > 98-AF376120-4575/SIN/98  
 > 98-AM939592\_EP/13372/1998  
 > 98-AM939593\_EP/17728/1998  
 > 98-AY055191-H0001-TW-98  
 > 98-AY055192-N5055-TW-98  
 > 98-AY055193-H0139-TW-98  
 > 98-AY055194-N4643-TW-98  
 > 98-AY055195-H0358-TW-98  
 > 98-AY055196-N5385-TW-98  
 > 98-AY055197-N6356-TW-98  
 > 98-AY055198-N6108-TW-98  
 > 98-AY055199-N5811-TW-98  
 > 98-AY055200-N5202-TW-98  
 > 98-AY207630-0808-MAA-98  
 > 98-AY207631-0557-MAA-98  
 > 98-AY940112-1181-SYD-98  
 > 98-AY940113-0964-SYD-98  
 > 98-DQ841953-AFP98111341-TW  
 > 98-DQ841954-AFP98111207-TW  
 > 98-DQ841955-E98014-TW  
 > 98-DQ841956-E98046-TW  
 > 98-DQ841957-E98083-TW  
 > 98-DQ841958-E98143-TW  
 > 98-DQ841959-E98551-TW  
 > 98-DQ841960-E98683-TW  
 > 98-DQ841961-E98815-TW  
 > 98-DQ841962-E981085-TW  
 > 99-AB213616-932-Yamagata-99  
 > 99-AB213617-957-Yamagata-99  
 > 99-AB213618-983-Yamagata-99  
 > 99-AB213619-1002-Yamagata-99  
 > 99-AF190577-31214-AZ-99  
 > 99-AF376092-15M/AUS/8/99  
 > 99-AF376102-27M/AUS/2/99  
 > 99-AF376103-2M/AUS/3/99  
 > 99-AF376106-5M/AUS/5/99  
 > 99-AF376107-6F/AUS/6/99  
 > 99-AF376108-7F/AUS/6/99  
 > 99-AF376109-8M/AUS/6/99  
 > 99-AF376110-9F/AUS/6/99  
 > 99-AM939583\_EP/5622/1999  
 > 99-AM939585\_EP/7414/1999  
 > 99-AM939588\_EP/9027/1999  
 > 99-AY207629-0838-MAA-99  
 > 99-AY207653-0749-MAA-99  
 > 99-DQ841963-E990005-TW  
 > 00-AB115490-F1-CHN-00  
 > 00-AB115491-F2-CHN-00  
 > 00-AB115492-H25-CHN-00  
 > 00-AB115493-H26-CHN-00  
 > 00-AB177810-1116-Yamagata-00  
 > 00-AF376087-S40221/SAR/00  
 > 00-AF376098-1M/AUS/12/00  
 > 00-AM939590\_EP/11168/2000  
 > 00-AM939594\_EP/449/2000  
 > 00-AY125966-KOR-EV71-01  
 > 00-AY125967-KOR-EV71-02  
 > 00-AY125968-KOR-EV71-3  
 > 00-AY125969-KOR-EV71-05  
 > 00-AY125970-KOR-EV71-06  
 > 00-AY125971-KOR-EV71-07  
 > 00-AY125972-KOR-EV71-08  
 > 00-AY125973-KOR-EV71-09  
 > 00-AY125974-KOR-EV71-10  
 > 00-AY125975-KOR-EV71-11  
 > 00-AY125976-KOR-EV71-13  
 > 00-AY207618-0807-MAA-00  
 > 00-AY207619-0836-MAA-00  
 > 00-AY207620-0915-MAA-00  
 > 00-AY207621-0937-MAA-00  
 > 00-AY207622-0948-MAA-00  
 > 00-AY207625-0113-MAA-00  
 > 00-AY207626-0389-MAA-00  
 > 00-AY207632-0832-MAA-00  
 > 00-AY207634-0774-MAA-00  
 > 00-AY207635-05716-MAA-00  
 > 01-AB177812-1585-Yamagata-01  
 > 01-AB213627-1695-Yamagata-01  
 > 01-AB213628-1814-Yamagata-01  
 > 01-AM939577\_EP/2063/2001  
 > 01-AM939580\_EP/2405/2001  
 > 01-AM939584\_EP/5746/2001  
 > 01-AM939586\_EP/8277/2001  
 > 01-AM939589\_EP/11052/2001  
 > 01-AM939591\_EP/12081/2001  
 > 01-AM939595\_EP/12105/2001  
 > 01-AM939596\_EP/4709/2001  
 > 01-AY895132-shzh01-3  
 > 01-AY895134-shzh01-4  
 > 02-AB115495-02363-Thai-02  
 > 02-AB213629-1779-Yamagata-02  
 > 02-AM939579\_EP/2353/2002  
 > 02-AM939581\_EP/2826/2002  
 > 02-AM939582\_EP/3267/2002  
 > 02-AY189154-S18191/SAR/02  
 > 02-AY258318-5026-SIN-02  
 > 02-AY258319-4381-SIN-02  
 > 02-AY547499-EV71-SHH02-6  
 > 02-AY547500-EV71-SHH02-17  
 > 02-AY895130-shzh02-40  
 > 02-AY895136-shzh02-62  
 > 03-AB177813-75-Yamagata-03  
 > 03-AB177814-100-Yamagata-03  
 > 03-AB213630-452-Yamagata-03  
 > 03-AB213631-638-Yamagata-03  
 > 03-AB213632-828-Yamagata-03  
 > 03-AB213633-944-Yamagata-03  
 > 03-AB213634-946-Yamagata-03  
 > 03-AB213635-1144-Yamagata-03  
 > 03-AB213636-1268-Yamagata-03  
 > 03-AB213637-1469-Yamagata-03  
 > 03-AB213638-1530-Yamagata-03  
 > 03-AB213639-1716-Yamagata-03  
 > 03-AB213640-1725-Yamagata-03  
 > 03-AB213641-1799-Yamagata-03  
 > 03-AB213642-1897-Yamagata-03  
 > 03-AB213643-2091-Yamagata-03  
 > 03-AB213644-2316-Yamagata-03  
 > 03-AB213645-2321-Yamagata-03  
 > 03-AB213646-2399-Yamagata-03  
 > 03-AY258294-SB9869-SAR-03  
 > 03-AY258295-SB9604-SAR-03  
 > 03-AY258296-SB9582-SAR-03  
 > 03-AY258297-SB9579-SAR-03  
 > 03-AY258298-SB9564-SAR-03  
 > 03-AY258299-SB9533-SAR-03  
 > 03-AY258300-SB9522-SAR-03  
 > 03-AY258301-SB9508-SAR-03  
 > 03-AY258302-SB9465-SAR-03  
 > 03-AY258312-S19761-SAR-03  
 > 03-AY258314-S19731-SAR-03  
 > 03-AY258315-S19691-SAR-03  
 > 03-AY258316-CN30552-SAR-03  
 > 03-AY258317-CN30014-SAR-03  
 > 03-AY465356-SHZH03  
 > 03-AY547501-EV71-CQ03-1  
 > 03-AY895133-shzh03-105  
 > 03-AY895135-shzh03-58  
 > 03-AY895138-shzh03-106  
 > 03-AY905614-ZJ-CHN-1-03  
 > 03-AY905615-ZJ-CHN-2-03  
 > 03-AY905616-ZJ-CHN-3-03  
 > 03-AY905617-ZJ-CHN-4-03  
 > 03-AY905618-ZJ-CHN-5-03  
 > 03-AY905619-ZJ-CHN-6-03  
 > 04-AM939587\_EP/8300/2004  
 > 04-AY895129-shzh04-J38  
 > 04-AY895131-shzh04-J42  
 > 04-AY895137-shzh04-J40  
 > 04-AY895139-shzh04-2  
 > 04-AY895140-shzh04-J39  
 > 04-AY895141-shzh04-23  
 > 04-AY895142-shzh04-3  
 > 04-AY895143-shzh04-20  
 > 04-AY895144-shzh04-12  
 > 04-AY895145-shzh04-38  
 > 04-DQ841964-E2004104-TW  
 > 04-DQ841965-E2004912-TW  
 > 04-DQ841966-E20041623-TW  
 > 05-AM490141-1001V/VNM/05  
 > 05-AM490142-1089T/VNM/05  
 > 05-AM490143-1091S/VNM/05  
 > 05-AM490144-1129V/VNM/05  
 > 05-AM490145-1135T/VNM/05  
 > 05-AM490146-1177T/VNM/05  
 > 05-AM490147-1192S/VNM/05  
 > 05-AM490148-1277S/VNM/05  
 > 05-AM490149-1301V/VNM/05  
 > 05-AM490150-1303S/VNM/05  
 > 05-AM490151-540V/VNM/05  
 > 05-AM490152-559S/VNM/05  
 > 05-AM490153-666T/VNM/05  
 > 05-AM490154-707V/VNM/05  
 > 05-AM490155-718T/VNM/05  
 > 05-AM490156-730T/VNM/05  
 > 05-AM490157-777T/VNM/05  
 > 05-AM490158-784S/VNM/05  
 > 05-AM490159-900S/VNM/05  
 > 05-AM490160-926V/VNM/05  
 > 05-AM490161-933V/VNM/05  
 > 05-AM490162-962T/VNM/05  
 > 05-AM490163-999T/VNM/05  
 > 05-AM939598\_H0/5440/288/2005  
 > 05-AM939603\_H0/5454/265/2005  
 > 05-DQ841967-E2005304-TW  
 > 05-DQ841968-E20051501-TW  
 > 05-DQ841969-E20051509-TW  
 > 05-DQ841970-E200510989-TW  
 > 05-DQ841971-E20051733-TW  
 > 06-AM939576\_H0/6438/418/2006  
 > 06-AM939578\_H0/6314/248/2006  
 > 06-AM939597\_STH/MCN/2006  
 > 06-AM939599\_H0/6486/445/2006  
 > 06-AM939600\_H0/6334/528/2006  
 > 06-AM939601\_H0/6290/136/2006  
 > 06-AM939602\_H0/6344/349/2006  
 > 06-AM939604\_H0/6332/439/2006  
 > 06-AM939605\_H0/6290/135/2006  
 > 06-AM939606\_H0/6344/348/2006  
 > 06-AM939607\_H0/6364/255/2006  
 > 08-EU703812-Fuyang\_Anhui  
 > 08-EU703813-Fuyang\_Anhui  
 > 08-EU703814-Fuyang\_Anhui  
 > 80-AB059816-Yamanashi/Japan \*  
 > 87-AF135934-0667-CHN-87 \*  
 > 97-AB115494-97-56-CHN-97 \*

\* Sub-genogroup unassigned by maximum likelihood analysis
