# Supplementary material
Source: PubMed Central journal article supplement (PMC2838098)
Supplement: supp_84_7_3339__4.pdf [file supp_84_7_3339__4.pdf]

**TABLE S2.** Evolutionary characteristics of enterovirus 71 genogroups B and C, and their respective sub-genogroups based on the VP1 gene

| Enterovirus 71 genogroup | Year first isolated<br>(Country) | Relaxed (uncorrelated lognormal) coalescent inference |                                |
|--------------------------|----------------------------------|-------------------------------------------------------|--------------------------------|
|                          |                                  | Exponential growth, HKY+ $\gamma_4$                   | Constant size, HKY+ $\gamma_4$ |
| <i>Genogroup B</i>       |                                  |                                                       |                                |
| Substitution rate*       |                                  | 4.8 (4.5,5.0)                                         | 4.7 (4.5,4.9)                  |
| Divergence time          |                                  |                                                       |                                |
| B1                       | 1972 (USA)                       | 1967.0 (1964.8,1969.1)                                | 1967.1 (1964.9,1969.0)         |
| B2                       | 1981 (USA)                       | 1978.8 (1977.8,1979.7)                                | 1978.9 (1978.0,1979.8)         |
| B3                       | 1997 (Malaysia)                  | 1994.9 (1993.9,1995.7)                                | 1994.7 (1993.6,1995.6)         |
| B4                       | 1997 (Malaysia)                  | 1993.3 (1991.7,1994.8)                                | 1993.3 (1991.7,1994.6)         |
| B5                       | 2003 (Japan)                     | 2001.3 (2000.7,2001.9)                                | 2001.2 (2000.7,2001.8)         |
| <i>Genogroup C</i>       |                                  |                                                       |                                |
| Substitution rate        |                                  | 4.4 (4.1,4.6)                                         | 4.2 (4.0,4.4)                  |
| Divergence time          |                                  |                                                       |                                |
| C1                       | 1986 (Australia)                 | 1983.3 (1982.3,1984.3)                                | 1983.2 (1982.1,1984.1)         |
| C2                       | 1995 (Australia)                 | 1992.9 (1991.5,1993.9)                                | 1992.8 (1991.6,1994.0)         |
| C3                       | 2000 (Korea)                     | 1998.8 (1998.3,1999.3)                                | 1998.8 (1998.3,1999.4)         |
| C4                       | 1998 (Taiwan)                    | 1993.0 (1991.2,1994.5)                                | 1992.8 (1990.8,1994.5)         |
| C5                       | 2005 (Vietnam)                   | 2002.9 (2002.0,2003.7)                                | 2002.7 (2001.8,2003.7)         |

Posterior distributions (evolutionary rates and divergence times) are estimated using a relaxed molecular clock model in the Bayesian Markov chain Monte Carlo (MCMC) framework.

\* Substitution rates are expressed as  $10^{-3}$  substitutions per site per year.
