# Supplementary material
Source: PubMed Central journal article supplement (PMC2838098)
Supplement: supp_84_7_3339__5.pdf [file supp_84_7_3339__5.pdf]

**TABLE S3.** Amino acid replacements on the trunk and terminal lineages of EV-71 sub-genogroup C1

| Residue         | Trunk lineages |           | Residue | Terminal lineages |           |
|-----------------|----------------|-----------|---------|-------------------|-----------|
|                 | Transition     | Frequency |         | Transition        | Frequency |
| #1 <sup>†</sup> | G>A            | 1         | #1      | G>A               | 4         |
| #22             | Q>R            | 1         |         | A>G               | 1         |
| #30             | Q>K            | 1         |         | A>V               | 1         |
| #31             | N>D            | 1         | #8      | I>V               | 1         |
| #43             | K>R            | 1         | #13     | G>R               | 1         |
| #145            | E>Q            | 1         | #17     | S>N               | 1         |
|                 | Q>E            | 1         | #20     | L>F               | 2         |
| #262            | V>I            | 1         | #24     | L>I               | 1         |
|                 | I>V            | 2         |         | L>S               | 1         |
| #289            | A>T            | 1         | #27     | P>S               | 1         |
|                 | T>A            | 1         | #31     | N>D               | 1         |
| #292            | T>A            | 1         | #33     | Q>R               | 1         |
| #296            | T>N            | 1         | #34     | V>A               | 1         |
|                 |                |           | #72     | S>L               | 1         |
|                 |                |           | #92     | E>G               | 1         |
|                 |                |           | #93     | I>V               | 1         |
|                 |                |           | #98     | E>K               | 12        |
|                 |                |           |         | E>G               | 1         |
|                 |                |           |         | K>N               | 1         |
|                 |                |           | #119    | M>V               | 1         |
|                 |                |           | #135    | F>V               | 1         |
|                 |                |           | #136    | T>S               | 1         |
|                 |                |           | #144    | G>A               | 1         |
|                 |                |           | #145    | E>Q               | 5         |
|                 |                |           |         | Q>E               | 3         |
|                 |                |           |         | E>A               | 1         |
|                 |                |           |         | E>G               | 1         |
|                 |                |           | #146    | V>I               | 1         |
|                 |                |           | #167    | E>K               | 1         |
|                 |                |           | #220    | L>I               | 1         |
|                 |                |           | #237    | T>N               | 1         |
|                 |                |           | #241    | S>L               | 1         |
|                 |                |           |         | S>M               | 1         |
|                 |                |           | #249    | I>V               | 2         |
|                 |                |           | #259    | R>Q               | 1         |
|                 |                |           | #262    | V>I               | 2         |
|                 |                |           | #280    | A>T               | 1         |
|                 |                |           | #282    | N>D               | 1         |
|                 |                |           | #283    | S>F               | 2         |
|                 |                |           |         | S>Y               | 1         |
|                 |                |           | #285    | K>R               | 1         |
|                 |                |           | #289    | A>V               | 2         |
|                 |                |           |         | T>A               | 1         |
|                 |                |           |         | T>I               | 1         |
|                 |                |           | #292    | A>T               | 1         |
|                 |                |           |         | T>K               | 1         |
|                 |                |           | #293    | A>G               | 1         |
|                 |                |           |         | A>S               | 1         |

<sup>†</sup> Amino acid replacement found in both the trunk and terminal lineages are indicated by color-coded amino acid residues.
