# Supplementary material
Source: PubMed Central journal article supplement (PMC2838098)
Supplement: supp_84_7_3339__6.pdf [file supp_84_7_3339__6.pdf]

**TABLE S4.** Published literature reporting laboratory-confirmed surveillance data of EV-71 cases since 1969

| Country      | Location                          | Year        | No. of confirmed cases included in reports | References                                                                                                             |
|--------------|-----------------------------------|-------------|--------------------------------------------|------------------------------------------------------------------------------------------------------------------------|
| USA          | California                        | 1969 - 1973 | 20                                         | Schmidt et al. 1974 J Infect Dis; Melnick JL. 1984 Rev Infect Dis                                                      |
| USA          | New York                          | 1972        | 11                                         | Deibel et al. 1975 Proc Soc Exp Biol Med; Melnick JL. 1984 Rev Infect Dis                                              |
| Australia    | Melbourne                         | 1972-1973   | 49                                         | Kennett et al. 1974 Bull WHO; Melnick JL. 1984 Rev Infect Dis                                                          |
| Japan        | 8 regions from Kyushu to Hokkaido | 1973        | 335                                        | Tagaya and Tachibana. 1975 Jap J Med Sci Biol; Hagiwara et al. 1978 Intervirology; Ishimaru et al. 1980 Arch Dis Child |
| Sweden       | Southern Sweden                   | 1973        | 195                                        | Blomberg J et al. 1974 Lancet                                                                                          |
| Bulgaria     |                                   | 1975        | 347                                        | Chumakov et al. 1979 Arch Virol; Shindarov et al. 1979 J Hyg Epid Microbiol Immunol; Melnick et al. 1979 Intervirology |
| USA          | New York                          | 1977        | 12                                         | Chonmaitree et al. 1981 Pediatrics                                                                                     |
| Japan        |                                   | 1978        | 692                                        | Ishimaru et al. 1980 Arch Dis Child; Tagaya et al. 1981 Jpn J Med Sci Biol                                             |
| Hungary      |                                   | 1978        | 323                                        | Nagy et al. 1982 Arch Virol                                                                                            |
| France       | Lyon                              | 1979        | 5                                          | WHO 1979 Weekly Epid Rec; Melnick JL. 1984 Rev Infect Dis                                                              |
| Hong Kong    |                                   | 1985        | 5                                          | Samuda et al. Pediatr Infect Dis J 1987                                                                                |
| USA          | Various states                    | 1985 - 1989 | 93                                         | Alexander et al. 1994 J Infect Dis                                                                                     |
| Taiwan       | Taipei                            | 1986        | 20                                         | Cited by Ho et al. 1999 N Engl J Med (through personal communication)                                                  |
| Brazil       | Various regions                   | 1989 - 1990 | 20                                         | Silva et al. 1996 Emerg Infect Dis                                                                                     |
|              | Sao Paulo State and Brasilia      | 1988 - 1990 | 39                                         | Takimoto et al. 1998 Trans R Soc Trop Med Hyg                                                                          |
| Malaysia     | Sarawak                           | 1997        | 889                                        | Chan et al. 2000 Clin Infect Dis                                                                                       |
|              | Kuala Lumpur                      | 1997        | 4                                          | Lum et al. J Pediatr 1998                                                                                              |
| Singapore    |                                   | 1997        | 23                                         | Singh et al. J Virol Methods 2000                                                                                      |
| Taiwan       | Whole of Taiwan                   | 1998        | 405                                        | Ho et al. 1999 N Engl J Med                                                                                            |
|              | Tainan, Kaohsiung, Taipei         | 1998        | 41                                         | Huang et al. 1999 N Engl J Med                                                                                         |
|              | Southern Taiwan                   | 1998        | 97                                         | Wang et al. Clin Infect Dis 1999                                                                                       |
|              | Tainan and Chiayi areas           | 1998        | 119                                        | Liu et al. 2000 J Clin Virol                                                                                           |
| Australia    | Perth                             | 1999        | 14                                         | McMinn et al. 2001 Clin Infect Dis                                                                                     |
| Korea        | Seoul, Kyunggi, Cheju             | 2000        | 12                                         | Jee et al. 2003 Arch Virol                                                                                             |
| Japan        | Hyogo Prefecture                  | 2000        | 30                                         | Fujimoto et al. 2002 Microbiol Immunol                                                                                 |
| Singapore    |                                   | 2000        | 22                                         | Singh et al. 2002 J Clin Microbiol                                                                                     |
| Germany      | West Germany                      | 2000        | 3                                          | Roth et al. 2007 J Med Virol                                                                                           |
| Japan        | All prefectures                   | 2000        | 500                                        | Hosoya et al. 2006 Pediatr Infect Dis J                                                                                |
| Malaysia     | Sarawak                           | 2000        | 169                                        | Podin et al. 2006 BMC Public Health; Ooi et al. 2007 Clin Infect Dis                                                   |
| Germany      | West Germany                      | 2001        | 3                                          | Roth et al. 2007 J Med Virol                                                                                           |
| Saudi Arabia |                                   | 2001        | 1                                          | Promed 11 Sept 2001                                                                                                    |
| China        | Shenzhen                          | 2001        | 3                                          | Li et al. 2005 J Clin Microbiol                                                                                        |
| Germany      | West Germany                      | 2002        | 2                                          | Roth et al. 2007 J Med Virol                                                                                           |

| Country   | Location         | Year      | No. of confirmed cases included in reports | References                                                           |
|-----------|------------------|-----------|--------------------------------------------|----------------------------------------------------------------------|
| Cyprus    | Nicosia          | 2002      | 2                                          | Richter et al. 2006 J Med Microbiol                                  |
| China     | Shenzhen         | 2002      | 2                                          | Li et al. 2005 J Clin Microbiol                                      |
| Germany   | West Germany     | 2003      | 6                                          | Roth et al. 2007 J Med Virol                                         |
| Japan     | All prefectures  | 2003      | 660                                        | Hosoya et al. 2006 Pediatr Infect Dis J                              |
| Malaysia  | Sarawak          | 2003      | 107                                        | Podin et al. 2006 BMC Public Health; Ooi et al. 2007 Clin Infect Dis |
| China     | Shenzhen         | 2003      | 3                                          | Li et al. 2005 J Clin Microbiol                                      |
| USA       | Colorado         | 2003      | 8                                          | Perez-Velez et al. 2007 Clin Infect Dis                              |
| Germany   | West Germany     | 2004      | 5                                          | Roth et al. 2007 J Med Virol                                         |
| Hong Kong |                  | 2004      | 35                                         | Promed Mail 11 July 2006                                             |
| Macao     |                  | 2004      | 1                                          | Promed Mail 15 April 2004                                            |
| China     | Shenzhen         | 2004      | 11                                         | Li et al. 2005 J Clin Microbiol                                      |
| Vietnam   | Ho Chi Minh City | 2005      | 173                                        | Tu et al. 2007 EID                                                   |
| Germany   | West Germany     | 2005      | 1                                          | Roth et al. 2007 J Med Virol                                         |
| Hong Kong |                  | 2005      | 8                                          | Promed Mail 11 July 2006                                             |
| USA       | Colorado         | 2005      | 8                                          | Perez-Velez et al. 2007 Clin Infect Dis                              |
| Brunei    |                  | 2006      | 34                                         | Promed Mail 26 April 2008, Promed Mail 8 Mar 2006                    |
| Hong Kong |                  | 2006      | 11                                         | Promed Mail 11 July 2006                                             |
| Hong Kong |                  | 2007      | 12                                         | Promed Mail 3 May 2008                                               |
| China     | Shandong         | 2007      | 964                                        | Promed Mail 4 May 2007                                               |
| Macao     |                  | 2008      | 4                                          | Promed Mail 7 May 2008                                               |
| Hong Kong |                  | 2008      | 10                                         | Promed Mail 3 May 2008                                               |
| Macao     |                  | 2008      | 34                                         | Promed Mail 30 May 2008                                              |
| Malaysia  | Sarawak          | 2000-2004 | 277                                        | Ooi et al. 2007 Clin Infect Dis                                      |
| Norway    | Oslo             | 2002-2003 | 19                                         | Witso et al. 2007 Virus Res; Witso et al. 2006 J Clin Microbiol      |
| USA       | Various states   | 1983-2005 | 270                                        | CDC 2006 MMWR                                                        |
| USA       | Various states   | 1983-2003 | 192                                        | Khetsuriani et al. 2006 Pediatr Infect Dis J                         |
